# Supplementary material for: In situ growth of triazine–heptazine based carbon nitride film for efficient (photo)electrochemical performance
Source: Royal Society of Chemistry journal article supplement (doi:10.1039/c8cy02105h), 2018-12-04
Supplement: c8cy02105h1.pdf [file c8cy02105h1.pdf]

***In-situ* growth of triazine-heptazine based carbon nitride film for efficient  
(photo)electrochemical performance**

*Qiaohui Jia, Sufen Zhang, Ziwei Gao, Peng Yang\*, and Quan Gu\**

Key Laboratory of Applied Surface and Colloid Chemistry, Ministry of Education, School of  
Chemistry and Chemical Engineering, Shaanxi Normal University, Xi'an, 710062, China.

Corresponding Author

\*E-mail: [guquan@snnu.edu.cn](mailto:guquan@snnu.edu.cn)

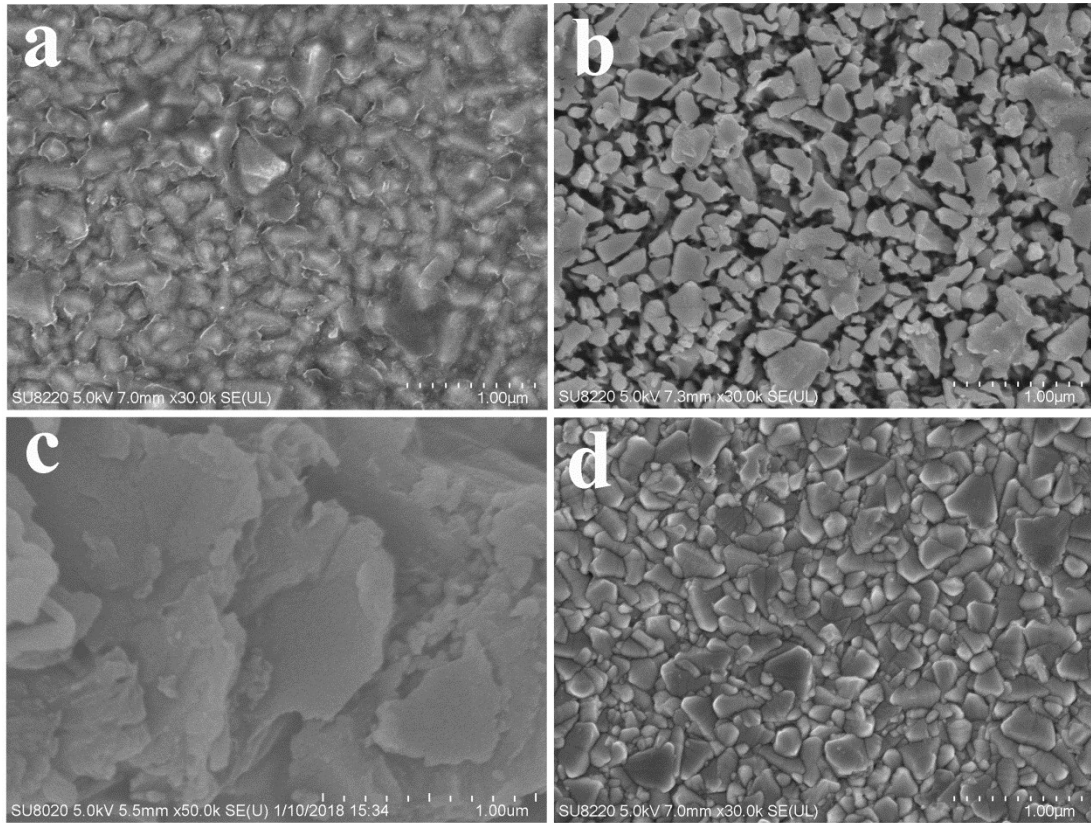

Figure S1 SEM images of CN-Me/FTO (a), CN-CC/FTO (b), g-C<sub>3</sub>N<sub>4</sub>/FTO (c), and FTO reference (d).

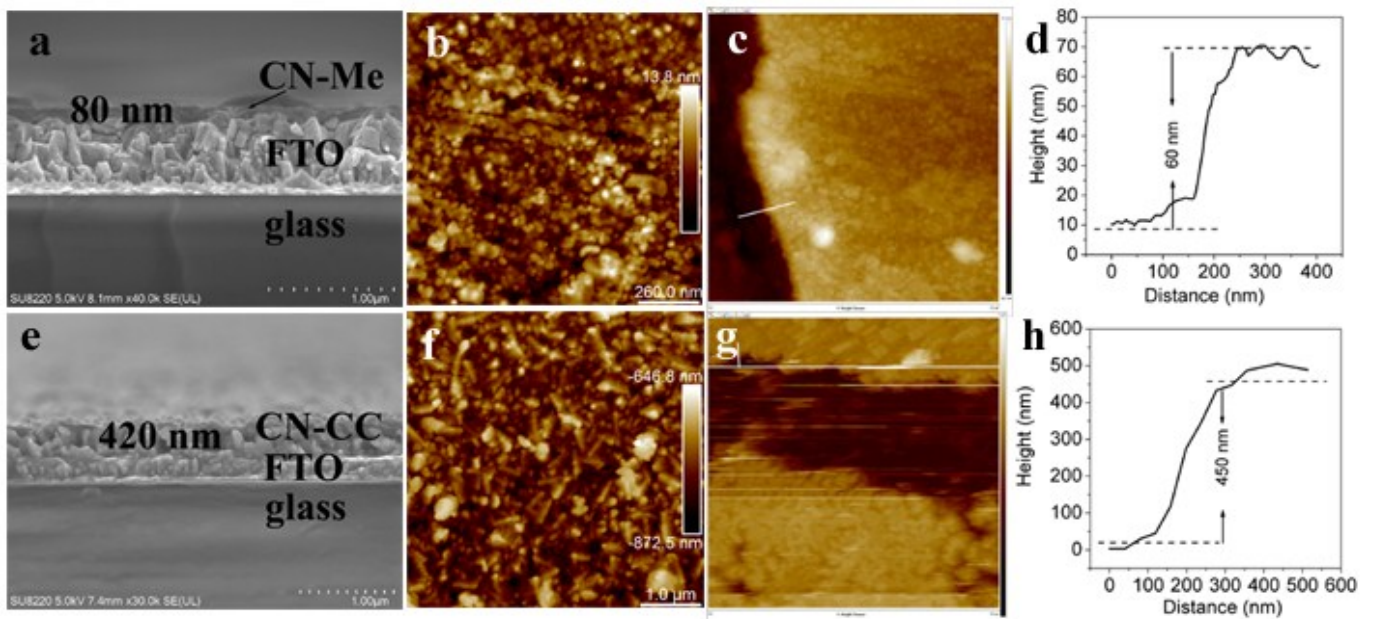

Figure S2 SEM images of cross-section of CN-Me/FTO (a) and CN-CC/FTO (e). AFM images of surface morphology and a typical thickness of CN-Me/FTO (b-d) and CN-CC/FTO (f-h).

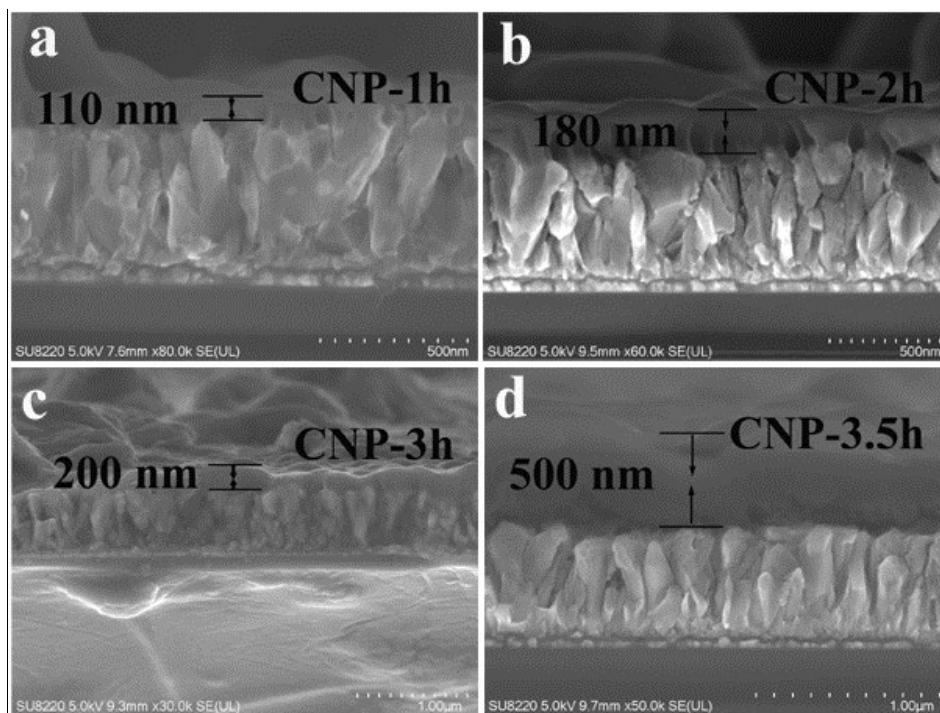

Figure S3 SEM images of cross-section of CNP/FTO films obtained from different growth time.

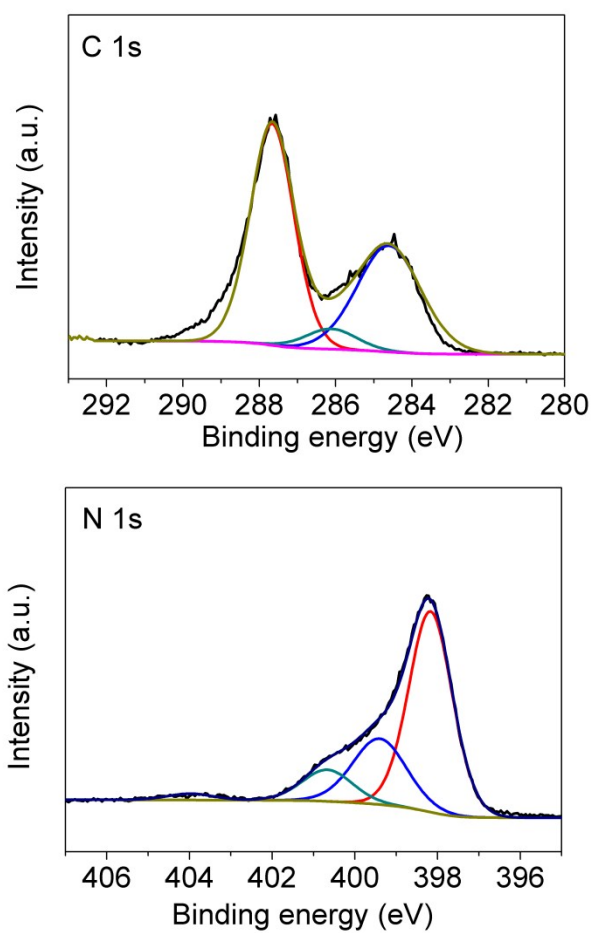

Figure S4 The high-resolution C 1s (a) and N 1s (b) XPS spectra of g-C<sub>3</sub>N<sub>4</sub>.

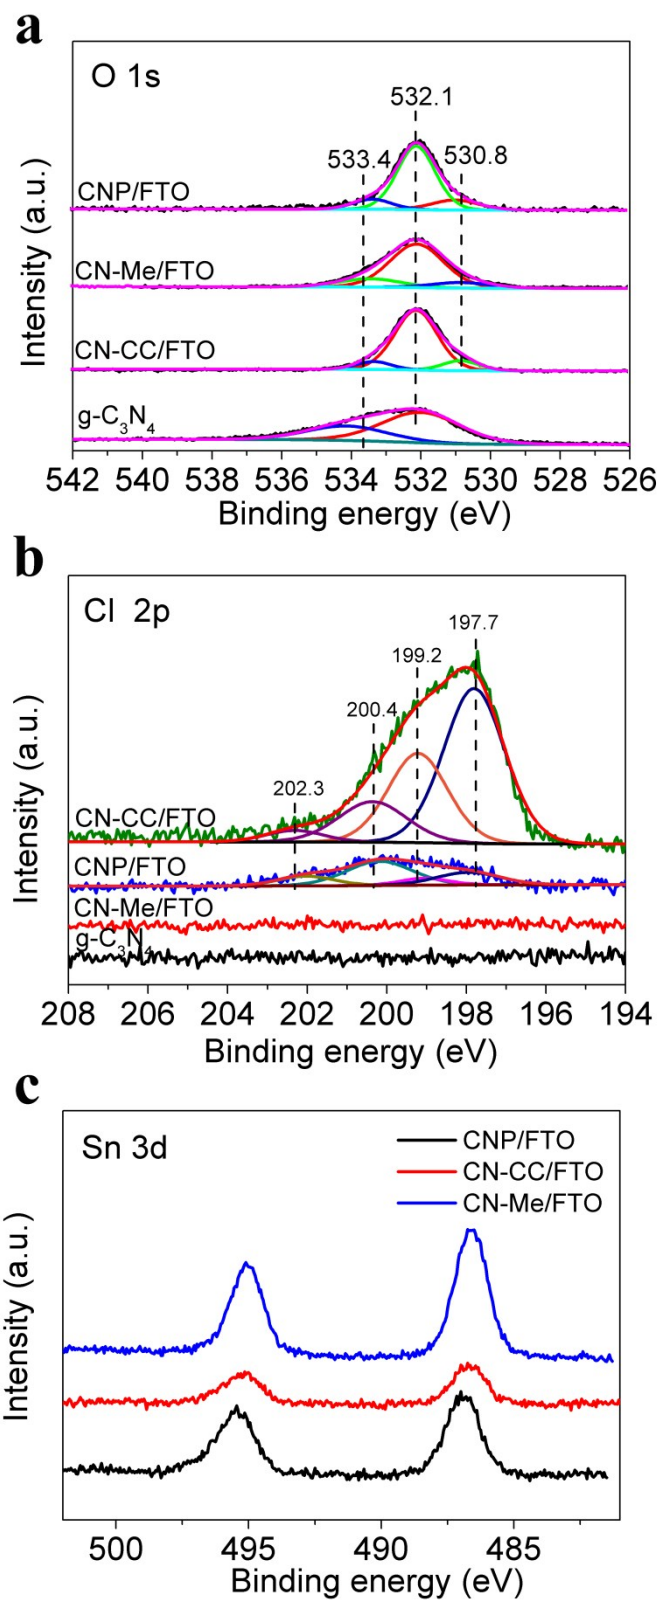

Figure S5 The high-resolution O 1s (a) and Cl 2p (b) XPS spectra of  $g-C_3N_4$ , CN-CC/FTO, CN-Me/FTO, and CNP/FTO; the high-resolution Sn 3d (c) XPS spectra of CN-CC/FTO, CN-Me/FTO, and CNP/FTO.

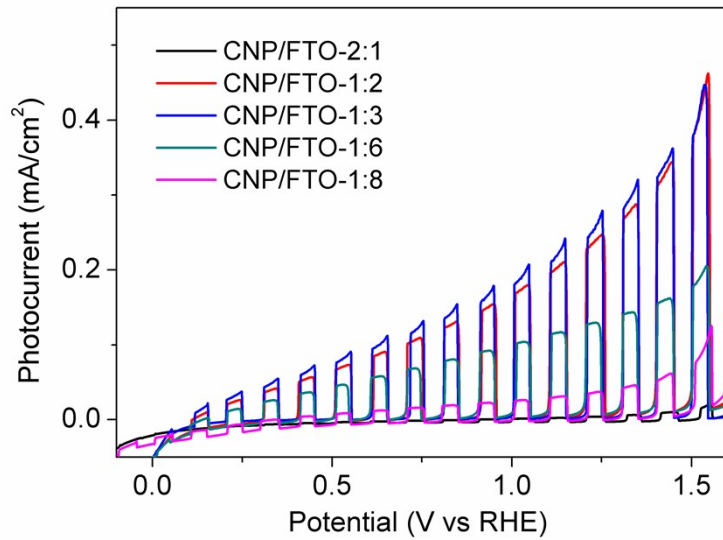

Figure S6 Linear sweep voltammetry (LSV) curves of CNP/FTO photoanodes obtained from different ratio of melamine and cyanuric chloride.

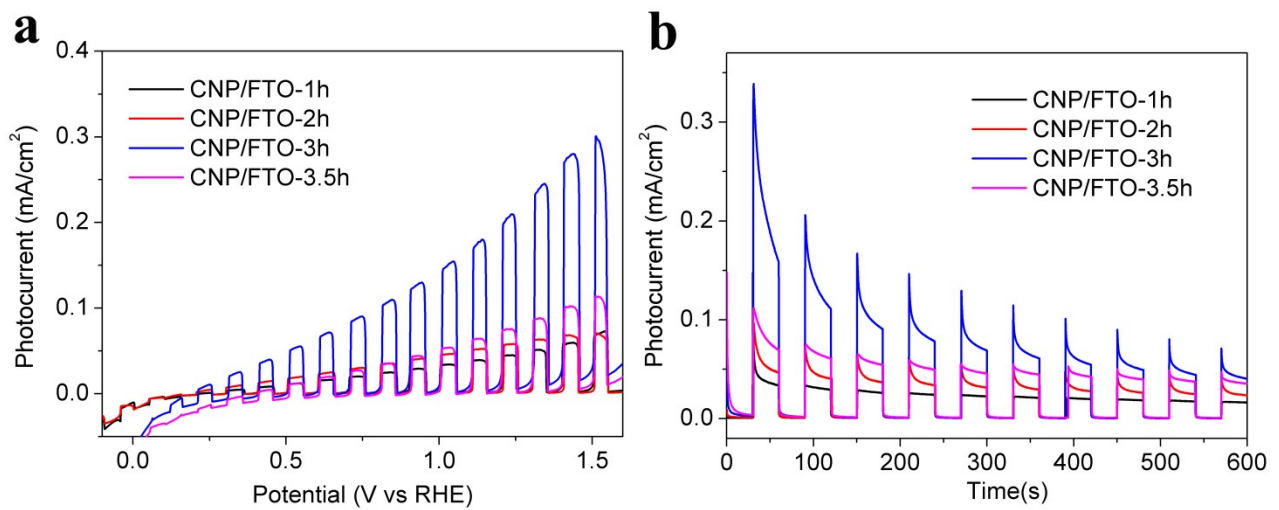

Figure S7 (a) Linear sweep voltammetry (LSV) curves of CNP/FTO photoanodes with different thickness of CNP film. (b) Long-time photocurrent response (i-t curve) of CNP/FTO photoanodes with different thickness of CNP film.

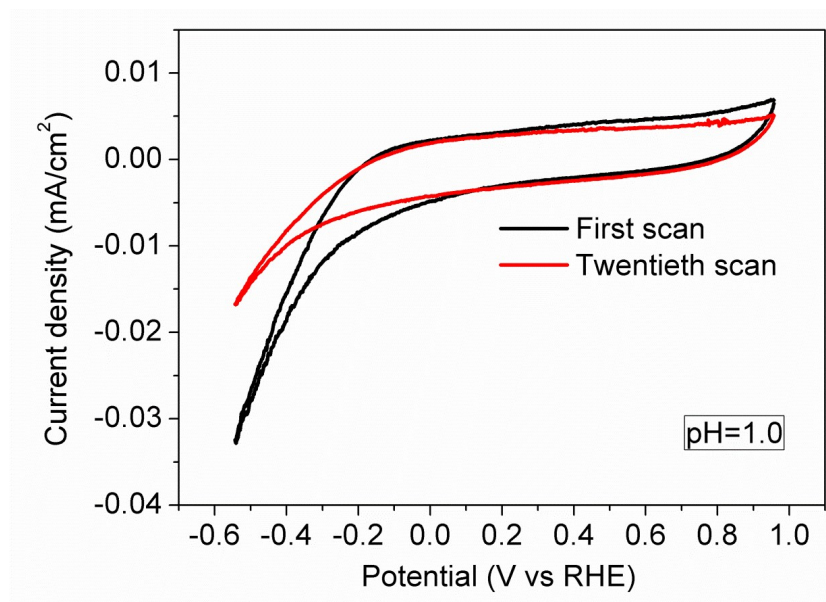

Figure S8 Cyclic voltammetry curves of CNP/FTO in 0.05 M  $\text{H}_2\text{SO}_4$  solution (pH=1.0).

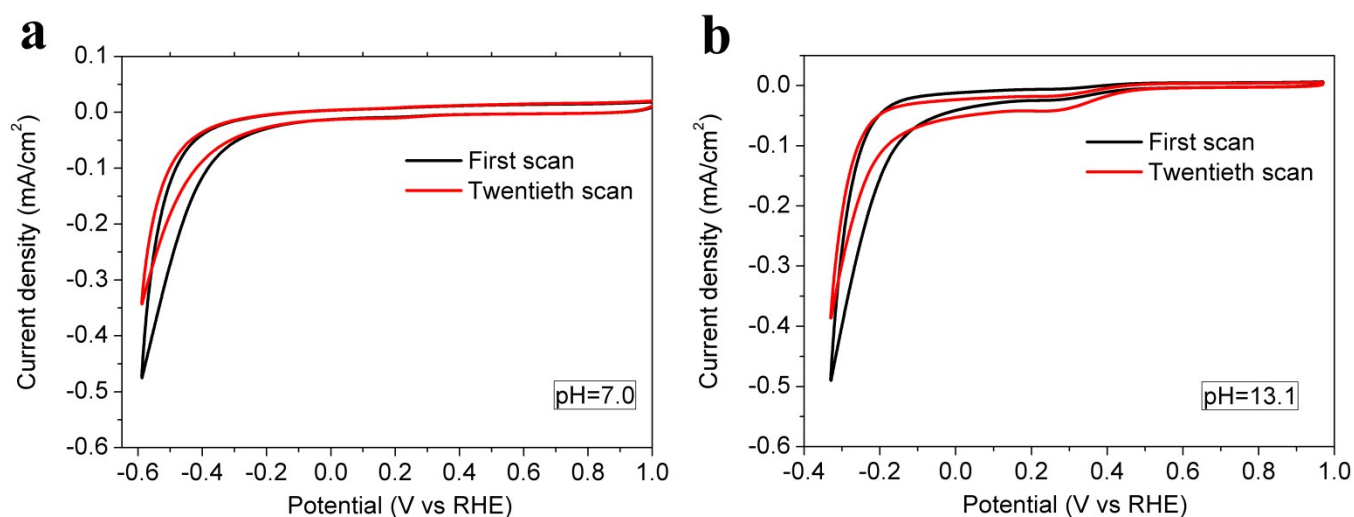

Figure S9 Cyclic voltammetry curves of CNP/FTO for the first and twentieth scans in (a) phosphate buffer solution (pH=7.0) and (b) 0.1m KOH solution (pH=13.1).

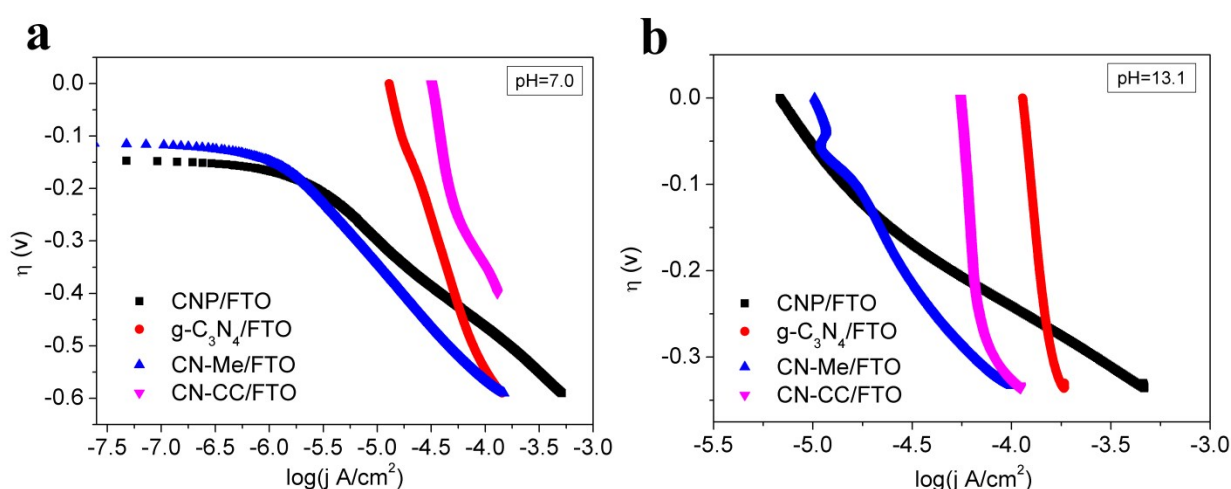

Figure S10 Tafel plots of  $\text{g-C}_3\text{N}_4/\text{FTO}$ ,  $\text{CN-CC}/\text{FTO}$ ,  $\text{CN-Me}/\text{FTO}$ , and  $\text{CNP}/\text{FTO}$  at pH=7.0 (phosphate buffer solution) and pH=13.1 (KOH 0,1M), respectively.

Table S1 Element contents of C, N, O, and Cl determined by elemental analysis.

| samples                         | Elemental content (wt%) |       |      |     | N/C mole ratio |
|---------------------------------|-------------------------|-------|------|-----|----------------|
|                                 | N                       | C     | H    | Cl  |                |
| g-C <sub>3</sub> N <sub>4</sub> | 58.56                   | 35.33 | 2.72 | -   | 1.53           |
| CN-CC                           | 36.79                   | 22.01 | 2.98 | 6.9 | 1.45           |
| CN-Me                           | 61.78                   | 35.19 | 1.88 | -   | 1.51           |
| CNP                             | 18.84                   | 13.93 | 1.95 | 3.5 | 1.16           |

Table S2 Assignments of the FTIR bands in ATR-FTIR spectra of the g-C<sub>3</sub>N<sub>4</sub>, CN-CC/FTO, CN-Me/FTO, and CNP/FTO films.

| Wavenumber(cm <sup>-1</sup> )   |               |                       |                        | Assignment                                                                     | References      |
|---------------------------------|---------------|-----------------------|------------------------|--------------------------------------------------------------------------------|-----------------|
| g-C <sub>3</sub> N <sub>4</sub> | CN-CC/FTO     | CN-Me/FTO             | CNP/FTO                |                                                                                |                 |
| 3259,<br>3156<br>3081           |               | 3262,<br>3156<br>3079 | 3260,<br>3156<br>3080  | The stretching vibrations of primary amines or hydrogen-bonding primary amines | [1-6, 9]        |
| 1640,<br>1564                   | 1638          | 1638,<br>1560         | 1637,<br>1560          | The stretching vibrations of the C=N in C-N heterocycles skeletal              | [1, 4-9]        |
| 1460,<br>1406                   | 1440          | 1455,<br>1403         | 1400                   | The stretching vibrations of C-N in C-N heterocycles skeletal                  | [1, 4, 6, 8, 9] |
| 1324,<br>1236                   | 1317,<br>1270 | 1320,<br>1236         | 1301,<br>1208,<br>1144 | The stretching vibrations the C-NH-C unit                                      | [10-14]         |
| 807                             | 809           | 807                   | 806                    | The breathing vibrations of triazine or heptazine units                        | [1, 3-10, 12]   |

Table S3 XPS peak positions of C1s, N1s, O 1s, Cl 2p<sub>3/2</sub> and Sn 3d<sub>5/2</sub> of the g-C<sub>3</sub>N<sub>4</sub>, CN-CC/FTO, CN-Me/FTO, and CNP/FTO films.

| Sample                          | XPS peak | Peak position (eV) | Attribution                                                      |
|---------------------------------|----------|--------------------|------------------------------------------------------------------|
| g-C <sub>3</sub> N <sub>4</sub> | C 1s     | 284.6              | contaminant aromatic carbon                                      |
|                                 |          | 286.2              | carbon linked to amino function (C-NH <sub>x</sub> , x=1, 2)     |
|                                 |          | 287.7              | sp <sup>2</sup> -hybridized carbon in s-triazine ring            |
|                                 | N 1s     | 398.3              | sp <sup>2</sup> -hybridized nitrogen in s-triazine rings (C-N=C) |
|                                 |          | 399.6              | tertiary nitrogen N-(C) <sub>3</sub> groups                      |
|                                 |          | 400.8              | amino functions caring hydrogen (-NH <sub>x</sub> , x=1, 2)      |
|                                 | O 1s     | 530-534            | adsorbed oxygen species on g-C <sub>3</sub> N <sub>4</sub>       |
| CN-CC/FTO                       | C 1s     | 284.6              | contaminant aromatic carbon                                      |
|                                 |          | 286.3              | carbon linked to amino function (C-NH <sub>x</sub> , x=1, 2)     |
|                                 |          | 288.3              | sp <sup>2</sup> -hybridized carbon in s-triazine ring            |
|                                 | N 1s     | 398.7              | sp <sup>2</sup> -hybridized nitrogen in s-triazine rings (C-N=C) |
|                                 |          | 399.9              | tertiary nitrogen N-(C) <sub>3</sub> groups                      |
|                                 |          | 401.1              | amino functions caring hydrogen (-NH <sub>x</sub> , x=1, 2)      |
|                                 | O 1s     | 530.8              | lattice oxygen of FTO                                            |
|                                 |          | 532.1              | hydroxyl oxygen of FTO or C-OH on CN-CC                          |

|                      |                      |                                        |                                                                  |
|----------------------|----------------------|----------------------------------------|------------------------------------------------------------------|
| CN-Me/FTO            | Cl 2p <sub>3/2</sub> | 533.4                                  | adsorbed oxygen species                                          |
|                      |                      | 197.7                                  | ionic Cl species                                                 |
|                      | Sn 2d <sub>5/2</sub> | 200.4                                  | C-Cl species                                                     |
|                      |                      | 486.7                                  | Sn of FTO                                                        |
|                      | C 1s                 | 284.6                                  | contaminant aromatic carbon                                      |
|                      |                      | 286.2                                  | carbon linked to amino function (C-NH <sub>x</sub> , x=1, 2)     |
|                      | N 1s                 | 288.0                                  | sp <sup>2</sup> -hybridized carbon in s-triazine ring            |
|                      |                      | 398.6                                  | sp <sup>2</sup> -hybridized nitrogen in s-triazine rings (C-N=C) |
|                      | O 1s                 | 399.9                                  | tertiary nitrogen N-(C) <sub>3</sub> groups                      |
|                      |                      | 401.1                                  | amino functions caring hydrogen (-NH <sub>x</sub> , x=1, 2)      |
| CNP/FTO              | Sn 3d <sub>5/2</sub> | 530.8                                  | lattice oxygen of FTO                                            |
|                      |                      | 532.1                                  | hydroxyl oxygen of FTO or C-OH on CN-Me                          |
|                      | C 1s                 | 533.4                                  | adsorbed oxygen                                                  |
|                      |                      | 284.6                                  | contaminant aromatic carbon                                      |
|                      | N 1s                 | 286.3                                  | carbon linked to amino function (C-NH <sub>x</sub> , x=1, 2)     |
|                      |                      | 288.2                                  | sp <sup>2</sup> -hybridized carbon in s-triazine ring            |
|                      | O 1s                 | 398.8                                  | sp <sup>2</sup> -hybridized nitrogen in s-triazine rings (C-N=C) |
|                      |                      | 399.9                                  | tertiary nitrogen N-(C) <sub>3</sub> groups                      |
|                      | Cl 2p <sub>3/2</sub> | 401.1                                  | amino functions caring hydrogen (-NH <sub>x</sub> , x=1, 2)      |
|                      |                      | 530.8                                  | lattice oxygen of FTO                                            |
| Sn 3d <sub>5/2</sub> | 532.1                | hydroxyl oxygen of FTO or C-OH on CNPs |                                                                  |
|                      | 533.4                | adsorbed oxygen species                |                                                                  |
| Cl 2p <sub>3/2</sub> | 197.7                | ionic Cl species                       |                                                                  |
|                      | 200.3                | C-Cl species                           |                                                                  |
| Sn 3d <sub>5/2</sub> | 486.8                | Sn of FTO                              |                                                                  |

Table S4 The decay time constants, the corresponding pre-exponential factors, and the mean lifetime for all the samples.

| Sample                               | $\tau_1$<br>(ns)<br>(Rel.%) | $\tau_2$<br>(ns)<br>(Rel.%) | $\tau_m$ (ns) | Ex (nm) | Em (nm) |
|--------------------------------------|-----------------------------|-----------------------------|---------------|---------|---------|
| g-C <sub>3</sub> N <sub>4</sub> /FTO | 3.44 (47.21)                | 10.48 (52.79)               | 7.08          | 360     | 450     |
| CN-CC/FTO                            | 1.73(46.19)                 | 7.40 (53.81)                | 4.61          | 312     | 440     |
| CN-<br>Me/FTO                        | 1.67 (52.32)                | 6.60 (47.68)                | 4.03          | 310     | 450     |
| CNP/FTO                              | 1.07 (61.15)                | 5.76 (38.85)                | 2.90          | 312     | 470     |



Table S5 The summary of the preparation and photoelectrochemical performance for O<sub>2</sub> evolution reaction of reported carbon nitride photoanodes.

| Entry | Photoanode                      | Preparation method                    | Precursor                                                       | Preparation temperature | Electrolyte                                                                                                                   | Light source                                                                 | Photocurrent density (μA/cm <sup>2</sup> ) at 1.23 V vs RHE | reference                               |
|-------|---------------------------------|---------------------------------------|-----------------------------------------------------------------|-------------------------|-------------------------------------------------------------------------------------------------------------------------------|------------------------------------------------------------------------------|-------------------------------------------------------------|-----------------------------------------|
| 1     | CNP/FTO                         | Evaporation polymerization            | Melamine and cyanuric chloride                                  | 450 °C                  | 0.5 M Na <sub>2</sub> SO <sub>4</sub>                                                                                         | Xe lamp, simulated solar irradiation (1 sun, AM 1.5)                         | 230                                                         | this work                               |
| 2     | PMF-0.8/FTO                     | Thermal vapor condensation            | Melamine and formaldehyde in 2 M H <sub>2</sub> SO <sub>4</sub> | 550 °C                  | 0.2 M Na <sub>2</sub> SO <sub>4</sub>                                                                                         | Xe lamp, simulated solar irradiation (1 sun, AM 1.5)                         | 228.2                                                       | ChemSusChem, 2018, 11, 1-6              |
| 3     | g-CN600 on FTO                  | Thermal vapor condensation            | Melamine                                                        | 600 °C                  | 0.1 M Na <sub>2</sub> SO <sub>4</sub> containing 0.1 M Na <sub>2</sub> SO <sub>3</sub> and 0.01 M Na <sub>2</sub> S (pH=11.6) | Xe lamp, simulated solar irradiation (1 sun, AM 1.5), 100 mW/Cm <sup>2</sup> | 130                                                         | Nano Energy, 2015, 15, 353-361          |
| 4     | CMD5 (modified CN films) on FTO | Thermal vapor condensation            | Melamine and 2,6-Diaminopyridine                                | 600 °C                  | 0.1 M Na <sub>2</sub> SO <sub>4</sub> containing 0.1 M Na <sub>2</sub> SO <sub>3</sub> and 0.01 M Na <sub>2</sub> S (pH=11.6) | Xe lamp, simulated solar irradiation (1 sun, AM 1.5)                         | 100                                                         | Adv. Energy Mater., 2016, 6, 1600263    |
| 5     | CNBC/FTO                        | Solvothermal method                   | Melamine and cyanuric chloride                                  | 200 °C                  | 0.5 M Na <sub>2</sub> SO <sub>4</sub>                                                                                         | Xe lamp, simulated solar irradiation (1 sun, AM 1.5)                         | 4                                                           | J. Mater. Chem. A, 2017, 5, 19062-19071 |
| 6     | CN@FTO-10% on FTO               | Microcontact-Printing-Assisted Access | Cyanamide                                                       | 550 °C                  | 0.1 M Na <sub>2</sub> SO <sub>4</sub>                                                                                         | Simulated solar light source (AM 1.5)                                        | 30.2                                                        | Adv. Mater., 2015, 27, 712-718          |
| 7     | CN-h/FTO                        | Solvothermal method                   | Melamine and cyanuric chloride                                  | 180 °C                  | 0.2 M Na <sub>2</sub> SO <sub>4</sub>                                                                                         | Visible light (λ > 420 nm, 200 W Xe lamp)                                    | 3.5                                                         | RSC Adv., 2016, 6, 9916-9922            |
| 8     | PCN on FTO                      | Powder coating                        | Melamine                                                        | -                       | 0.5 M Na <sub>2</sub> SO <sub>4</sub>                                                                                         | Xe lamp, simulated solar irradiation (1 sun, AM 1.5)                         | 7                                                           | Angew. Chem. Int. Ed., 2018,            |

|    |                                          |                                         |                                                                   |        |                                       |                                                                                                                                |      |                                                   |
|----|------------------------------------------|-----------------------------------------|-------------------------------------------------------------------|--------|---------------------------------------|--------------------------------------------------------------------------------------------------------------------------------|------|---------------------------------------------------|
|    |                                          |                                         |                                                                   |        |                                       |                                                                                                                                |      | 57, 1-6                                           |
| 9  | Co <sup>2+</sup> -CN@FTO                 | Template method and impregnation method | Cyanamide                                                         | 550 °C | 0.2 M Na <sub>2</sub> SO <sub>4</sub> | 50 W white light-emitting diode ( $\lambda > 410$ nm)                                                                          | 7.5  | Chem. Asian J., 2018, 13, 1539-1543               |
| 10 | g-CN films on FTO                        | Two-step vapor deposition               | Dicyandiamide                                                     | 500 °C | 0.1 M Na <sub>2</sub> SO <sub>4</sub> | Xe lamp, simulated solar irradiation (1 sun, AM 1.5)                                                                           | 63   | Carbon, 2017, 117 (Supplement C), 343-350         |
| 11 | Ni Embedded CN <sub>x</sub> Films on FTO | Liquid-mediated pathway                 | Cyanuric acid/2,4-diamino-6-phenyl-1,3,5-triazine/nickel chloride | 550 °C | 0.1 M KOH                             | Simulated AM 1.5 solar illumination (100 mW cm <sup>-2</sup> ) with a Newport Sol3A Class AAA solarsimulator (94023A-SR3 type) | 69.8 | ACS Appl. Mater. Interfaces, 2017, 9, 32667-32677 |
| 12 | Ph-CN thin films on FTO                  | Liquid-mediated approach                | Cyanuric acid/2,4-diamino-6-phenyl-1,3,5-triazine                 | 500 °C | 0.1 M KOH                             | 50 W white LED ( $\lambda > 410$ nm, HLN-60H-24A, Mean Well)                                                                   | 60   | Adv. Funct. Mater., 2015, 25, 6265-6271           |
| 13 | s-BCN on FTO                             | Rapid thermal vapour deposition         | Dicyandiamide and boric Acid                                      | 600 °C | 0.1 M Na <sub>2</sub> SO <sub>4</sub> | AM 1.5 illumination at 100 mW/cm                                                                                               | 103  | Angew. Chem. Int. Ed., 2017, 56, 8221-8225        |

Table S6 Tafel slopes calculated from current density-voltage (*J-V*) curves of samples.

| Samples                              | Tafel slops (mV/dec) |       |
|--------------------------------------|----------------------|-------|
|                                      | pH=7                 | pH=13 |
| CNP/FTO                              | 154                  | 172   |
| g-C <sub>3</sub> N <sub>4</sub> /FTO | 598                  | 1815  |
| CN-Me/FTO                            | 196                  | 343   |
| CN-CC/FTO                            | 522                  | 1280  |

## References

- [1] Michael J. Bojdys, Jens-Oliver Muller, Markus Antonietti, Arne Thomas, Chem. Eur. J. 2008, 14, 8177-8182.
- [2] Honghui Ou, Xinru Chen, Lihua Lin, Yuanxing Fang, Xinchun Wang, Angew. Chem. Int. Ed. 2018, 57, 8729-8733.
- [3] Ping Niu, Li-Chang Yin, Yong-Qiang Yang, Gang Liu, Hui-Ming Cheng, Adv. Mater. 2014, 26, 8046-8052.
- [4] Huijun Yu, Run Shi, Yunxuan Zhao, Tong Bian, Yufei Zhao, Chao Zhou, Geoffrey I. N. Waterhouse, Li-Zhu Wu, Chen-Ho Tung, Tierui Zhang, Adv. Mater. 2017, 29, 1605148.
- [5] Xuefei Li, Jian Zhang, Longhai Shen, Yanmei Ma, Weiwei Lei, Qiliang Cui, Guangtian Zou, Appl. Phys. A, 2009, 94, 387-392.
- [6] Pengju Yang, Ruirui Wang, Min Zhou, Xinchun Wang, Angew. Chem. Int. Ed. 2018, 57, 8674-8677.
- [7] Bettina V. Lotsch, Wolfgang Schnick, Chem. Mater. 2006, 18, 1891-1900.
- [8] Satyabadi Martha, Amtul Nashim and K. M. Parida, J. Mater. Chem. A, 2013, 1, 7816-7824.
- [9] Huanhuan Liu, Deliang Chen, Zhiqiang Wang, Huijuan Jing, Rui Zhang, Appl. Catal. B: Environ. 2017, 203, 300-313.
- [10] Eva Wirnhier, Maria B. Mesch, Jürgen Senker, Wolfgang Schnick, Chem. Eur. J. 2013, 19, 2041-2049.
- [11] Vincent Wing-hei Lau, Maria B. Mesch, Viola Duppel, Volker Blum, Jürgen Senker, Bettina V. Lotsch, J. Am. Chem. Soc. 2015, 137, 1064-1072.
- [12] Katharina Schwinghammer, Maria B. Mesch, Viola Duppel, Christian Ziegler, Jürgen Senker, Bettina V. Lotsch, J. Am. Chem. Soc. 2014, 136, 1730-1733.
- [13] Eva Wirnhier, Markus Döblinger, Daniel Gunzelmann, Jürgen Senker, Bettina V. Lotsch, Wolfgang Schnick, Chem. Eur. J. 2011, 17, 3213-3221.
- [14] Tamikuni Komatsu, J. Mater. Chem., 2001, 11, 799-801.
